# Supplementary material
Source: PubMed Central journal article supplement (PMC2735915)
Supplement: JCI38660sd.pdf [file JCI38660sd.pdf]

**Supplemental Table 1** Summary of whole body dual energy X-ray absorptiometry (DEXA) of Patient 4

|           | % Fat |
|-----------|-------|
| Left arm  | 7.2   |
| Right arm | 7.5   |
| Trunk     | 6.6   |
| Left leg  | 4.7   |
| Right leg | 3.9   |
| Subtotal  | 5.9   |
| Head      | 18.3  |
| Total     | 7.1   |

**Supplemental Table 2** Laboratory data of the parents of Patient 4 with a heterozygous

*PTRF* c.696697insC mutation.

|                            | Father       | Mother       |
|----------------------------|--------------|--------------|
| Height/<br>Body weight     | 161cm/61kg   | 158cm/73kg   |
| BMI                        | 23.4         | 29.2         |
| T-chol (140-199mg/dl)      | 262          | ND           |
| TG (<149mg/dl)             | 180          | 111          |
| HDL-C (>40mg/dl)           | 55.1         | 71           |
| LDL (<119mg/dl)            | 195          | 123          |
| Fasting glucose (<99mg/dl) | 113          | ND           |
| HbA1c (<5.1%)              | ND           | 5.2          |
| Others                     | Hypertension | Hypertension |
| Ultrasonography            | Normal       | ND           |

ND: not done

**Supplemental Table 3** Primers used in this study

|             | Exon        | Primers                            |                               |
|-------------|-------------|------------------------------------|-------------------------------|
| <i>PTRF</i> | Ex 1-1      | F 5' CTGCTTCTCTCCGGGTCTC 3'        |                               |
|             |             | R 5' AGCTTGCTCACCGTATTGCT 3'       |                               |
|             | Ex 1-2      | F 5' CCGGCTCAGAAGAGCTGAT 3'        |                               |
|             |             | R 5' GTCTCCCCACCCCAACTC 3'         |                               |
|             | Ex 2-1      | F 5' CCCTCTCTCCAGGATCGTC 3'        |                               |
|             |             | R 5' AGCTTGTTTCATGCGCTTCTC 3'      |                               |
|             | Ex 2-2      | F 5' CCGCGAGAACCTGGAGAA 3'         |                               |
|             |             | R 5' ACAGCTCTAAGACTGGGAGTGG 3'     |                               |
|             | mRNA        | F 5' GCTTCTCTCCGGGTCTCC 3'         |                               |
|             |             | R 5' ACAGCTCTAAGACTGGGAGTGG 3'     |                               |
| <i>CAVI</i> | Ex 1        | F 5' TCAGTTCCTTAAAGCACAGC 3'       |                               |
|             |             | R 5' GCAGTCGGGATATTTGGAGA 3'       |                               |
|             | Ex 2        | F 5' TGTTTTTCTTTTTGCATTTTTCC 3'    |                               |
|             |             | R 5' GCTAACTGCCAGAGGAGAGC 3'       |                               |
|             | Ex 3        | F 5' TCTTTTCTTCTATTCTGTGCTCATGT 3' |                               |
|             |             | R 5' GAAATTGGCACCAGGAAAAT 3'       |                               |
|             | mRNA        | F 5' CAGGGAAACCTCCTCACAGT 3'       |                               |
|             |             | R 5' GCAACTTGGAAGTTGAAATTGG 3'     |                               |
|             | <i>CAV2</i> | mRNA                               | F 5' AGTTCCTGACGGTGTTCCCTG 3' |
|             |             |                                    | R 5' CGTCCTACGCTCGTACACAA 3'  |
| <i>CAV3</i> | Ex 1        | F 5' AGCGACCGCCGAGTTGG 3'          |                               |

|             |      |                                |
|-------------|------|--------------------------------|
|             | R    | 5' CCGAGGCAGGCCTGCAGAGCC 3'    |
| Ex 2        | F    | 5' GCTTCTGTGAGTTGAGGCTT 3'     |
|             | R    | 5' ATCATGGGGTATGGAGCAGT 3'     |
| mRNA        | F    | 5' GATGATGGCAGAAGAGCACA 3'     |
|             | R    | 5' GTGGACAACAGACGGTAGCA 3'     |
| <i>LMNA</i> | Ex 1 | F 5' CCCAGATCCCGAGGTCCGAC 3'   |
|             | R    | 5' CCTCTCCACTCCCCGCCA 3'       |
|             | Ex 2 | F 5' ATTGCAGGCATAGCAGCGC 3'    |
|             | R    | 5' GAGGGCCTAGGTAGAAGAG 3'      |
|             | Ex 3 | F 5' TTCTTGTGTTCTGTGACCCCTT 3' |
|             | R    | 5' CCCAAGTCTGTCATCACCCA 3'     |
|             | Ex 4 | F 5' GTCCCTGGGTCTTGGCCTCC 3'   |
|             | R    | 5' GCCACCATCTGCCTGATCC 3'      |
|             | Ex 5 | F 5' GCTGTAGCAGTGATGCCCAAC 3'  |
|             | R    | 5' CCAAAGCCCTGAGAAGTGAAG 3'    |
|             | Ex 6 | F 5' CAGCTGTCTCCTACACCGACC 3'  |
|             | R    | 5' GGTCTAGTCAAGGCCAGTTGC 3'    |
|             | Ex 7 | F 5' GAGGTGCTGGCAGTGCCTC 3'    |
|             | R    | 5' CTTCTGTCTTGCCACTCTCTCC 3'   |
|             | Ex 8 | F 5' ACCCAAGAGCCTGGGTGAGC 3'   |
|             | R    | 5' CACCCAAGGTCTCCCCAGAG 3'     |
|             | Ex 9 | F 5' TTGGGTGTCGATGGGAGCGC 3'   |
|             | R    | 5' GCAGCTGCCTCCGATGTTGG 3'     |

Ex 10 F 5' ACCCTTCCCTGGCCCTGAC 3'  
R 5' CACCTGGGTTCCTGTTCAAG 3'

Ex 11 F 5' GGTCAGTCCCAGACTCGCC 3'  
R 5' CGCCTGCAGGATTTGGAAGAC 3'

Ex 12 F 5' TGAGGGATGGGGGAGATGCT 3'  
R 5' GGGTGGGCATGAGGTGAGGA 3'

*AGPAT2*

Ex 1 F 5' GCAATAAGGGGCCTGAGC 3'  
R 5' AAAGTTAGGGAAGCGGAAGC 3'

Ex 2 F 5' CTGTGTCTCCCGGTCTCCT 3'  
R 5' CCCACTCAAACCCAGAAG 3'

Ex 3 F 5' CAGGTAGCCAGGGAGAAGG 3'  
R 5' TGATGTGGGGGTCTTGTTTT 3'

Ex 4 F 5' CAGCTGCTTTGCGAAGTG 3'  
R 5' GTGGTCACCTGCTGCCTTA 3'

Ex 5 F 5' CTCCCCAACCATGCAG 3'  
R 5' GGAAATGGGAACGATGAGG 3'

Ex 6 F 5' TAGGGAGTCCAGGGGAAGAG 3'  
R 5' CCTCTGCCCATCCTCCAG 3'

*BSCL2*

Ex 2 F 5' CACAGGTATCAGCGTCTGGA 3'  
R 5' ACGCCAGCCCACCTATTT 3'

Ex 3 F 5' CTCGTTCCCTCAAAGCCAGTC 3'  
R 5' GAACTCCAAGGGCCTTACAA 3'

Ex 4 F 5' GGGCAAAGAAGGTGTATGGA 3'

R 5' AGGCCTTTCTCAAGTCTTCCT 3'  
 Ex 5 F 5' GGCTAAGAGGGAGGTGGAAT 3'  
 R 5' CCCCTACCCATTCTGATCCT 3'  
 Ex 6 F 5' GATCTGGCATGCACCTGTC 3'  
 R 5' CAGGTAGAATCCTGGGCTAATG 3'  
 Ex 7 F 5' TCAGATGAGGCGGGTAAGAG 3'  
 R 5' GACCCTCTTGGTGGAAGGTT 3'  
 Ex 8 F 5' TGGTGCTCTCTGGTAACTGC 3'  
 R 5' CCCTGACCACCCACAAAG 3'  
 Ex 9 F 5' GCATGAGGGTCCTGATTGTT 3'  
 R 5' CGGTGATACCCTAAGCCTCA 3'  
 Ex 10 F 5' ACCGACTGAGACAAGGGTCA 3'  
 R 5' TGAAGGAGAAAGCCAAGGAG 3'  
 Ex 11 F 5' GCCACCACACTCTCTCCTTC 3'  
 R 5' CCAGGAAAGGGAAAAACAAA 3'  
 Ex 12 F 5' GGCCCCCGGTTAATCTAATA 3'  
 R 5' GAAAAACGAGGGGAGAGGAG 3'  
*PPARG* Ex 1 F 5' AACGGATTGATCTTTTGCTAGA 3'  
 R 5' CAAACACAACCTGGAAGACAAA 3'  
 Ex 2 F 5' CGCCCAGATGAGATTACTTTG 3'  
 R 5' TGAGAGATGAGTCCAATTCTAGTCC 3'  
 Ex 3 F 5' CCCTGTTGCCTTTTTAGGAC 3'  
 R 5' GGGGTTCTGCTGAAATGAAA 3'

Ex 4 F 5' GCTGCTTCCATGTGTCATAAA 3'  
R 5' GGTCTGGCAGCTATAATGAGAA 3'

Ex 5 F 5' GGAGGGCTTCTACTGTGTGG 3'  
R 5' GTGTGCATTTGTAGCGCAGT 3'

Ex 6 F 5' GTTTTCTGAACCTGGGATGG 3'  
R 5' ACCATCATCCCACCCTCTTT 3'

Ex 7 F 5' CGTGCAAAACACTGTACCAAG 3'  
R 5' TGGAAGAAGGGAAATGTTGG 3'

*AKT2* Ex 2 F 5' CAGACTGTGCCCTGTCCAC 3'  
R 5' TGGCTCCTCAGGCTGGTA 3'

Ex 3 F 5' CCTGGGACATCACTCAACCT 3'  
R 5' TCCTGTGAGCACCAGAACAC 3'

Ex 4 F 5' TAGCAGGGCTATCCCCTCAG 3'  
R 5' CCCAGGGAAAATCTCTCCAG 3'

Ex 5 F 5' TCAGCTGTTCTGACTCTGAGG 3'  
R 5' ATGGAAACCAAGGAGAGCAG 3'

Ex 6 F 5' TGGCAACAGTGTCTTTTGGT 3'  
R 5' CTCAGGGTCAGGCTCCAG 3'

Ex 7 F 5' CTGCATTTATGGCTGGGAAT 3'  
R 5' TCTCTGAGCTCTGTCCAAAGG 3'

Ex 8 F 5' AGGGTGTGTGTGTGCAGAAT 3'  
R 5' TAAAGAAGGAGGCCCCAGAG 3'

Ex 9 F 5' GGAAGGTGAGGGCAGGTG 3'

|                 |      |                                  |
|-----------------|------|----------------------------------|
|                 | R    | 5' AGTGTGAGTCCCATGTGGTG 3'       |
| Ex 10           | F    | 5' TGGGAGCATGCACCTGAG 3'         |
|                 | R    | 5' GGCTGGAAACACACAGGTCT 3'       |
| Ex 11           | F    | 5' CTGAGGGCAGGACTGTGATG 3'       |
|                 | R    | 5' GACACACTGCGACCCTACAA 3'       |
| Ex 12-13        | F    | 5' ATACAGGGCCTGCCTGCT 3'         |
|                 | R    | 5' GCCCTCCTTGAGAAGTGAGTT 3'      |
| Ex 14           | F    | 5' CCCTCTCCTGACTGGTCCTC 3'       |
|                 | R    | 5' GTGGGGACACAAACCAAAAA 3'       |
| <i>ZMPSTE24</i> | Ex 1 | F 5' AAGGGACGAGTGTCGGTGT 3'      |
|                 | R    | 5' TCGAAGCCAAGGCTACTCC 3'        |
|                 | Ex 2 | F 5' TGGCAAGCTATAAACCATTTCG 3'   |
|                 | R    | 5' TGAAAATGAAAACAACCAGACA 3'     |
|                 | Ex 3 | F 5' TGCCTTTCTTTCTTTATACCATGC 3' |
|                 | R    | 5' TTAGTGGAAAGCCTGCCAAG 3'       |
|                 | Ex 4 | F 5' CTTGTTGATTTGTTTGCCAGT 3'    |
|                 | R    | 5' CAGGACAAAAGCACAGAAGTTTT 3'    |
|                 | Ex 5 | F 5' GCAGAACCAGTTTCTCAGTTTC 3'   |
|                 | R    | 5' TCTCACCAAGGAACTTTTGC 3'       |
|                 | Ex 6 | F 5' CCTGGGAATACCAGAGCAAG 3'     |
|                 | R    | 5' TCAAATAAAACAAACCACTTGGA 3'    |
|                 | Ex 7 | F 5' CTCAAAGGACCCCAAACCTT 3'     |
|                 | R    | 5' CACAGGAAGTGTGTATAAAAATAAGG 3' |



|              |      |                                      |
|--------------|------|--------------------------------------|
| Ex 8         | F    | 5' AGGGCTATTACTGGGTAAAAGA 3'         |
|              | R    | 5' CCTCTCATGCCTGCCATAGT 3'           |
| Ex 9         | F    | 5' CCCATAGTGAAATCAGCTTGGTA 3'        |
|              | R    | 5' TTGAAGCAGGCAAGAGCATA 3'           |
| Ex 10        | F    | 5' TCCTCTTATCCCAAGCCAAA 3'           |
|              | R    | 5' TCAAGAGCTGGAACATGCTG 3'           |
| <i>MSTN</i>  | mRNA | F 5' TGATGTCCAGAGGGATGACA 3'         |
|              |      | R 5' GAGTCTCGACGGGTCTCAA 3'          |
| <i>GAPDH</i> | mRNA | F 5' GGTAAGTGGATATTGTTGCCATCAATG 3'  |
|              |      | R 5' GGAGGGATCTCGCTCCTGGAAGATGGTG 3' |

## Supplemental figures

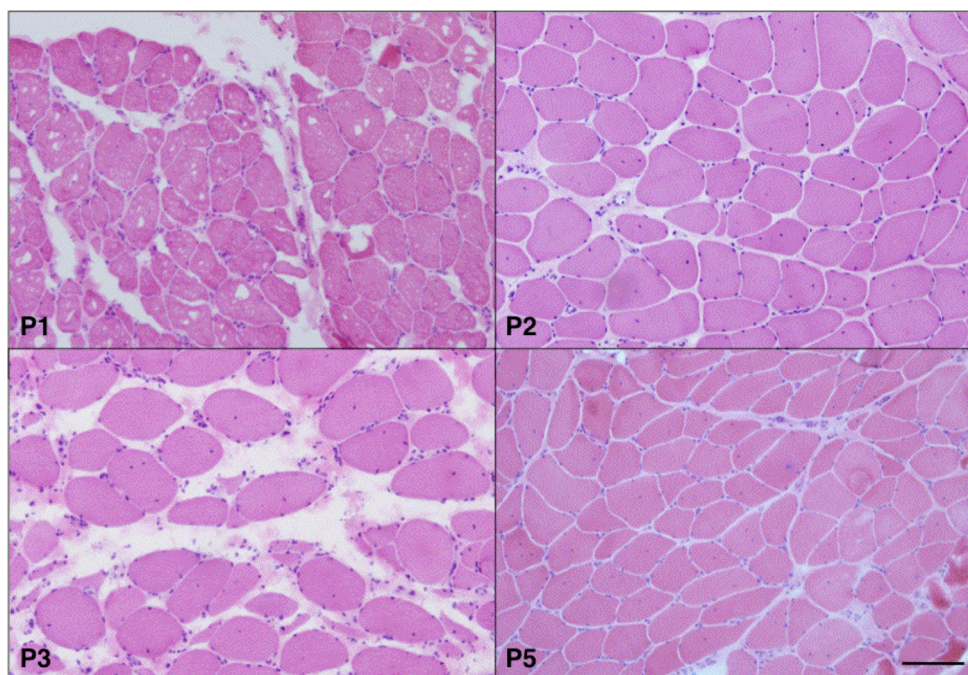

**Supplemental Figure 1** Hematoxylin and eosin staining of biopsied skeletal muscle from Patient 1 (P1), Patient 2 (P2), Patient 3 (P3), and Patient 5 (P5) shows variable dystrophic changes.

**MHC of each gel used for Fig.7**

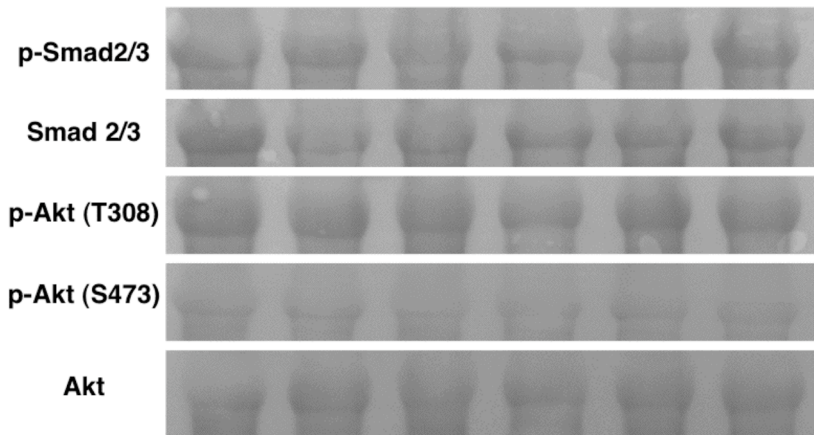

**Supplemental Figure 2** CBB staining of each gel for immunoblotting analysis for phosphorylation of Smad and Akt (Figure 7) shows similar protein amounts of myosin heavy chain (MHC).
